# Supplementary material for: Spatial patterns and spatially-varying factors associated with childhood acute respiratory infection: data from Ethiopian demographic and health surveys (2005, 2011, and 2016)
Source: Springer Nature journal article supplement (doi:10.1186/s12879-023-08273-1), 2023-05-05
Supplement: MOESM3 [file 25324322]

Additional file 3: Comparison of performance between spatial regression models

Supplementary table 1: validation test between the OLS, GWR, MGWR, and RE-ESF models

| Outcome measures  | OLS      | GWR      | MGWR     | RE-ESF        |
|-------------------|----------|----------|----------|---------------|
| AIC               | 4728.994 | 1722.741 | 4687.556 | -966.69121146 |
| BIC               | -        | 1925.255 | 4790.226 | -891.33122989 |
| Adjusted R square | 0.042    | 0.131    | 0.122    | 0.22030476    |
